# Supplementary material for: A feasibility study of direct analysis in real time-mass spectrometry for screening organic gunshot residues from various substrates
Source: Royal Society of Chemistry journal article supplement (doi:10.1039/d3ay01258a), 2023-01-01
Supplement: d3ay01258a1.pdf [file d3ay01258a1.pdf]

## Supplemental Information

### A Feasibility Study of Direct Analysis in Real Time-Mass Spectrometry for Screening Organic Gunshot Residues from Various Substrates

## Supplemental Information

### 1. Shooter's Hand Samples Results

**Tables S1** and **S2** provide detailed information on the results obtained from the DART-MS analysis of the shooter's hand samples per compound. These results were used to determine whether a sample was classified as characteristic of OGSR (colored green in the table's criteria column, at least two *Category I* compounds present), consistent with OGSR (yellow, at least one *Category I* and one *Category II*), commonly associated with OGSR (orange, at least one *Category I* or *Category II* compound present), or was negative for OGSR (red, no compounds detected). For information regarding compound-specific classification criteria (i.e., *Category I* or *II*), please refer to **Table 4** within the main text. Samples with compounds listed as not detected (ND) had either the compounds outside of the mass range or below the relative intensity limit, and these results are presented in white background cells in **Tables S1 and S2**. In **Tables S1 and S2**, the results for detected compounds that met the mass range criteria ( $\pm 0.005$  Da) and the minimum relative intensity criteria ( $>3\%$ ) are presented in cells colored in green. The results for each detected compound include the exact mass and the relative intensity percent (RI).

**Table S1** illustrates that out of the 50 samples examined, 15 had residues characteristic of OGSR, 8 consistent with OGSR, and 8 commonly associated with OGSR, for a total of 31 of the samples having at least one OGSR compound (62%). The remaining 19 samples were negative for OGSR screening. Fiocchi and Winchester provided the most positive results from the ammunition tested in this set.

**Table S2** presents the results for the second set, consisting of Winchester ammunition of various calibers. In this set, the samples were only monitored in positive mode due to uncontrolled circumstances of malfunctioning of the negative mode at that time, therefore affecting the capability of reporting results *characteristic of OGSR*. However, there was an increase in the positive results, with 15 out of 30 samples classified as consistent with OGSR, and 12 additional samples commonly associated with OGSR, for a total of 27 samples with at least one OGSR



**Tables S3** and **S4** provide detailed information on the results obtained from the LC-MS/MS analysis of the shooter's hand samples. These results were used to determine whether a sample was considered positive or negative for OGSR using the same categories described above for DART-MS, except that the "commonly associated with OGSR" result is not applicable for a confirmatory method. The method's LODs are listed for each compound at the bottom of the table. Compounds listed as ND produced a predicted concentration result below the method's LOD and are presented in cells with white background. Compounds colored on a green background list the estimated concentration in ppb. Here, it becomes evident that some of the compounds detected by LC-MS/MS were present in the hand samples at concentrations below the DART-MS method's LOD, providing a better understanding of the screening results presented in Tables S1 and S2. Notably, one disadvantage of the LC-MS/MS configuration used in this study is that it only detects the compounds in positive mode, therefore, NG and 2,4-DNT were only monitored by DART-MS. In the first set, only 27 of the 50 samples monitored by LC-MS/MS were positive for OGSR (54%), which is somehow atypical of positive rates observed in previous studies with larger population datasets. **Table S4** shows that when evaluating a second dataset with other ammunition types, the positive rates drastically increased to 97%, all of which were classified as *characteristic of OGSR*. These results corroborate the findings of the DART-MS screening and indicate that the success rates on hand residues are dependent on the ammunition used in the shooting event. Importantly, all the DART-MS presumptive "positive" results were further corroborated by LC-MS/MS confirmatory method, indicating the utility of DART-MS for screening purposes.

**Table S3.** Results from the first 50 shooter’s hand samples analyzed by LC-MS/MS for set 1.

| Authentic Hand Samples- LC-MS/MS, Subset 1 |              |        |      |       |       |          |          |                |
|--------------------------------------------|--------------|--------|------|-------|-------|----------|----------|----------------|
| Sample No.                                 | Manufacturer | [AKII] | [MC] | [EC]  | [DPA] | [2-NDPA] | [4-NDPA] | Criteria       |
| 1                                          | Blazer       | ND     | ND   | ND    | ND    | ND       | ND       | Negative       |
| 2                                          | Blazer       | ND     | ND   | 62.8  | 5.6   | ND       | ND       | Consistent     |
| 3                                          | Blazer       | ND     | ND   | ND    | 3.9   | ND       | ND       | Negative       |
| 4                                          | Blazer       | ND     | ND   | ND    | ND    | ND       | ND       | Negative       |
| 5                                          | Blazer       | 8.8    | ND   | ND    | 22.9  | ND       | ND       | Consistent     |
| 6                                          | Blazer       | 7.4    | ND   | ND    | 20.6  | ND       | ND       | Consistent     |
| 7                                          | Blazer       | ND     | ND   | ND    | ND    | ND       | ND       | Negative       |
| 8                                          | Blazer       | ND     | ND   | ND    | 3.9   | ND       | ND       | Negative       |
| 9                                          | Blazer       | ND     | ND   | ND    | ND    | ND       | ND       | Negative       |
| 10                                         | Blazer       | 5.8    | ND   | ND    | 12.6  | ND       | ND       | Consistent     |
| 11                                         | Federal      | ND     | ND   | ND    | 7.4   | ND       | ND       | Negative       |
| 12                                         | Federal      | ND     | ND   | ND    | ND    | ND       | ND       | Negative       |
| 13                                         | Federal      | ND     | ND   | ND    | 5.5   | ND       | ND       | Negative       |
| 14                                         | Federal      | ND     | ND   | ND    | ND    | ND       | ND       | Negative       |
| 15                                         | Federal      | 1.1    | ND   | ND    | 9.2   | ND       | ND       | Consistent     |
| 16                                         | Federal      | ND     | ND   | ND    | ND    | ND       | ND       | Negative       |
| 17                                         | Federal      | ND     | ND   | ND    | ND    | ND       | ND       | Negative       |
| 18                                         | Federal      | ND     | ND   | ND    | ND    | ND       | ND       | Negative       |
| 19                                         | Federal      | ND     | ND   | ND    | ND    | ND       | ND       | Negative       |
| 20                                         | Federal      | 4.3    | ND   | ND    | 16.6  | ND       | ND       | Consistent     |
| 21                                         | Fiocchi      | ND     | ND   | ND    | 4.2   | ND       | ND       | Negative       |
| 22                                         | Fiocchi      | ND     | ND   | 10.5  | 12.9  | ND       | ND       | Consistent     |
| 23                                         | Fiocchi      | ND     | ND   | 128   | 139   | 4.8      | 7.4      | Characteristic |
| 24                                         | Fiocchi      | ND     | ND   | ND    | 5.0   | ND       | ND       | Negative       |
| 25                                         | Fiocchi      | ND     | ND   | 65.4  | 53.6  | ND       | 4.5      | Characteristic |
| 26                                         | Fiocchi      | ND     | ND   | 54.2  | 51.2  | ND       | 3.9      | Characteristic |
| 27                                         | Fiocchi      | ND     | ND   | 40.3  | 32.0  | ND       | 3.4      | Characteristic |
| 28                                         | Fiocchi      | ND     | ND   | 70.6  | 75.4  | ND       | 4.2      | Characteristic |
| 29                                         | Fiocchi      | ND     | ND   | 361   | 426   | 9.4      | 10.6     | Characteristic |
| 30                                         | Fiocchi      | ND     | ND   | 31.6  | 33.8  | ND       | 3.7      | Characteristic |
| 31                                         | Remington    | ND     | ND   | ND    | 4.9   | ND       | ND       | Negative       |
| 32                                         | Remington    | ND     | ND   | 20.1  | 19.1  | ND       | ND       | Consistent     |
| 33                                         | Remington    | ND     | ND   | 21.9  | 20.7  | ND       | ND       | Consistent     |
| 34                                         | Remington    | ND     | ND   | 272   | 7.7   | ND       | ND       | Consistent     |
| 35                                         | Remington    | ND     | ND   | 355   | 7.2   | ND       | ND       | Consistent     |
| 36                                         | Remington    | ND     | ND   | 208.9 | 4.4   | ND       | ND       | Consistent     |
| 37                                         | Remington    | ND     | ND   | 3.1   | ND    | ND       | 1.9      | Negative       |
| 38                                         | Remington    | ND     | ND   | ND    | ND    | ND       | 1.9      | Negative       |
| 39                                         | Remington    | ND     | ND   | 10.0  | 3.9   | ND       | ND       | Consistent     |
| 40                                         | Remington    | ND     | ND   | 3.7   | ND    | ND       | ND       | Negative       |
| 41                                         | Winchester   | ND     | ND   | ND    | ND    | ND       | ND       | Negative       |
| 42                                         | Winchester   | ND     | ND   | ND    | ND    | ND       | ND       | Negative       |
| 43                                         | Winchester   | 102    | ND   | 18.3  | 269   | 5.9      | 7.3      | Characteristic |
| 44                                         | Winchester   | 12.2   | ND   | 3.1   | 29.1  | ND       | 3.1      | Characteristic |
| 45                                         | Winchester   | ND     | ND   | ND    | 3.6   | ND       | ND       | Negative       |
| 46                                         | Winchester   | ND     | ND   | 5.9   | 6.6   | ND       | ND       | Characteristic |
| 47                                         | Winchester   | 86.5   | ND   | 14.3  | 226   | 5.0      | 6.1      | Characteristic |
| 48                                         | Winchester   | 2.6    | ND   | ND    | 13.4  | ND       | ND       | Consistent     |
| 49                                         | Winchester   | 114    | ND   | 20.1  | 319   | 5.5      | 7.8      | Characteristic |
| 50                                         | Winchester   | 32.6   | ND   | 4.1   | 78.4  | ND       | 3.7      | Characteristic |
| LOD (ppb)                                  |              | 0.3    | 0.3  | 1.0   | 3.4   | 2.7      | 3.0      |                |

**Table S4.** Results from the second set of 30 shooter's hand samples. This table follows the same layout as **Table S3**.

| Authentic Hand Samples- LC-MS/MS, Subset 2 |                        |        |      |      |       |          |          |                |
|--------------------------------------------|------------------------|--------|------|------|-------|----------|----------|----------------|
| Sample No.                                 | Manufacturer           | [AKII] | [MC] | [EC] | [DPA] | [2-NDPA] | [4-NDPA] | Criteria       |
| 1                                          | Winchester 9mm         | ND     | ND   | 4.5  | ND    | ND       | ND       | Negative       |
| 2                                          | Winchester 9mm         | 16.5   | ND   | 38.4 | 36.6  | 5.6      | ND       | Characteristic |
| 3                                          | Winchester 9mm         | 101    | ND   | 14.5 | 91.5  | 5.3      | ND       | Characteristic |
| 4                                          | Winchester 9mm         | 40.1   | ND   | 5.9  | 32.5  | 3.5      | ND       | Characteristic |
| 5                                          | Winchester 9mm         | 248    | ND   | 27.3 | 255   | 12.1     | 6.4      | Characteristic |
| 6                                          | Winchester 9mm         | 58.2   | ND   | 9.6  | 44.0  | 4.3      | ND       | Characteristic |
| 7                                          | Winchester 9mm         | 118    | ND   | 16.2 | 91.8  | 6.7      | ND       | Characteristic |
| 8                                          | Winchester 9mm         | 42.4   | ND   | 1.8  | 35.5  | 3.3      | ND       | Characteristic |
| 9                                          | Winchester 9mm         | 76.1   | ND   | 6.0  | 47.2  | 4.6      | ND       | Characteristic |
| 10                                         | Winchester 9mm         | 330    | ND   | 38.9 | 315   | 17.5     | 9.8      | Characteristic |
| 11                                         | Winchester .40         | ND     | ND   | 35.5 | 107   | 10.5     | 11.6     | Characteristic |
| 12                                         | Winchester .40         | ND     | ND   | 29.0 | 181   | 19.4     | 21.1     | Characteristic |
| 13                                         | Winchester .40         | ND     | ND   | 28.2 | 191   | 20.2     | 25.1     | Characteristic |
| 14                                         | Winchester .40         | ND     | ND   | 18.9 | 149   | 12.6     | 12.9     | Characteristic |
| 15                                         | Winchester .40         | ND     | ND   | 38.5 | 238   | 25.0     | 31.8     | Characteristic |
| 16                                         | Winchester .40         | 1.3    | ND   | 79.4 | 564   | 44.1     | 48.0     | Characteristic |
| 17                                         | Winchester .40         | ND     | ND   | 49.1 | 279   | 25.0     | 33.0     | Characteristic |
| 18                                         | Winchester .40         | ND     | ND   | 41.8 | 257   | 22.4     | 22.8     | Characteristic |
| 19                                         | Winchester .40         | 110    | ND   | 140  | 905   | 71.7     | 76.3     | Characteristic |
| 20                                         | Winchester .40         | 1.7    | ND   | 68.7 | 527   | 35.2     | 31.0     | Characteristic |
| 21                                         | Winchester .40 Defense | 79.1   | ND   | 76.1 | 770   | 79.6     | 75.0     | Characteristic |
| 22                                         | Winchester .40 Defense | ND     | ND   | 49.3 | 447   | 41.1     | 43.6     | Characteristic |
| 23                                         | Winchester .40 Defense | ND     | ND   | 24.4 | 268   | 23.8     | 22.3     | Characteristic |
| 24                                         | Winchester .40 Defense | ND     | ND   | 19.6 | 316   | 37.8     | 33.4     | Characteristic |
| 25                                         | Winchester .40 Defense | ND     | ND   | 28.1 | 324   | 35.2     | 41.1     | Characteristic |
| 26                                         | Winchester .40 Defense | ND     | ND   | 22.0 | 357   | 43.4     | 40.1     | Characteristic |
| 27                                         | Winchester .40 Defense | ND     | ND   | 34.4 | 653   | 66.7     | 58.4     | Characteristic |
| 28                                         | Winchester .40 Defense | ND     | ND   | 18.9 | 279   | 33.0     | 38.1     | Characteristic |
| 29                                         | Winchester .40 Defense | 3.0    | ND   | 59.1 | 970   | 86.2     | 65.0     | Characteristic |
| 30                                         | Winchester .40 Defense | ND     | ND   | 42.4 | 265   | 31.7     | 34.5     | Characteristic |
| LOD (ppb)                                  |                        | 0.3    | 0.3  | 1.0  | 3.4   | 2.7      | 3.0      |                |
